# Supplementary figures and images for: Glaucoma Is Associated with the Risk of Obstructive Sleep Apnea: A Population-Based Nationwide Cohort Study
Source: MDPI journal article supplement (doi:10.3390/diagnostics12122992), 2022-11-29

Distributional Balance

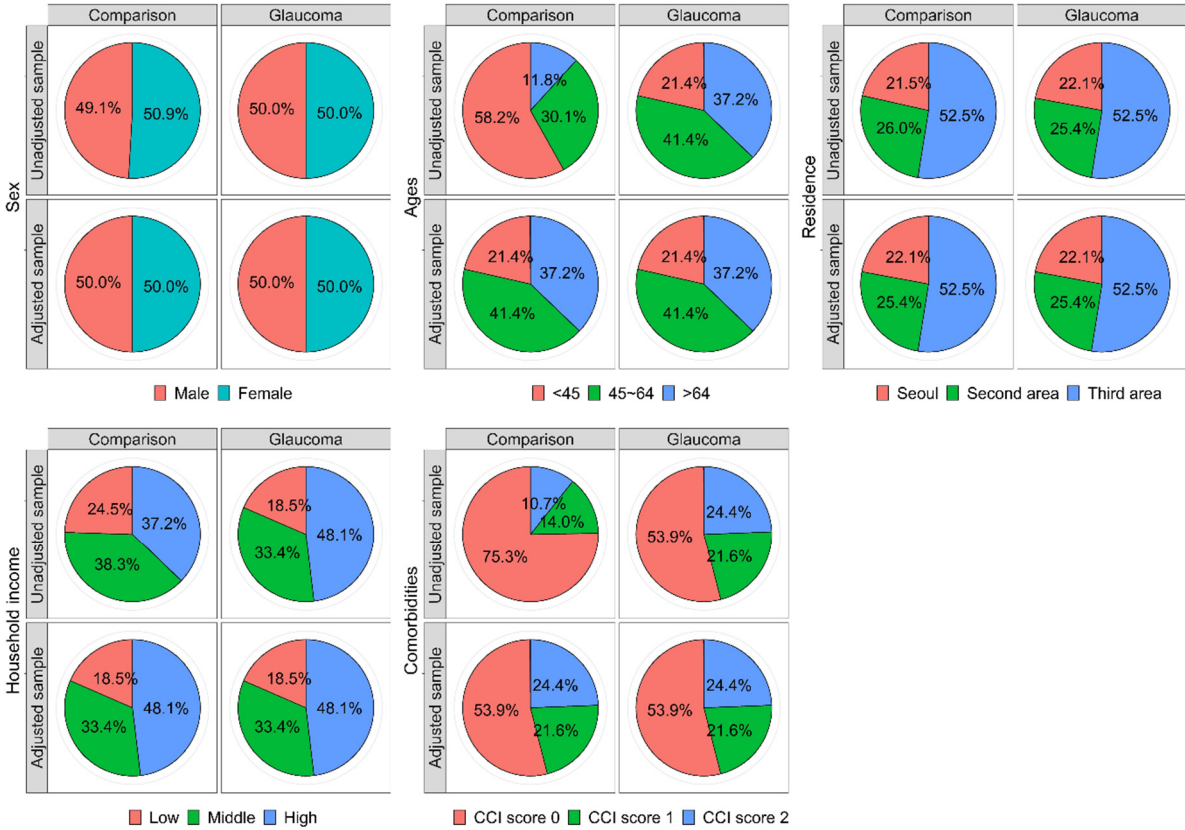

Figure S1. Balance plot for 5 variables before and after matching.

Supplement: s1 [file s1]
